# Supplementary material for: Coexistence of chiral phonons and antiferroelectricity in breathing kagome semiconductor Nb3I8 at room-temperature
Source: Research Square preprint supplement (doi:10.21203/rs.3.rs-3457733/v1), 2023-10-23
Supplement: Supplementary file 1 [file 1ff5e78e4d4b29b72fbe40f5.pdf]

## Section 1. Additional information about the microstructure of Nb<sub>3</sub>I<sub>8</sub> crystal

2D Nb<sub>3</sub>I<sub>8</sub> crystal stabilizes as layered structure at room temperature (Fig. S1a) with the chemical composition of Nb:I≈3:8 (Fig. S1b). However, it is extremely ambient-sensitive when being thinned down or prepared to be TEM lamellae. We adopt effective approaches to obtain HAADF-STEM images of Nb<sub>3</sub>I<sub>8</sub>, such as short exposure time to air and low probe voltage during image acquiring. In addition, to verify the atomic configurations of Nb<sub>3</sub>I<sub>8</sub>, we perform detailed simulations on HAADF-STEM images for different thick Nb<sub>3</sub>I<sub>8</sub> along both [100] and [001] zone axes (Fig. S2). Simulated results are well consistent with our experiments. Also, the alternating vdWs gaps at atomic-scale in Nb<sub>3</sub>I<sub>8</sub> are simulated along [100] and [120] zone axes, respectively (Fig. S3).

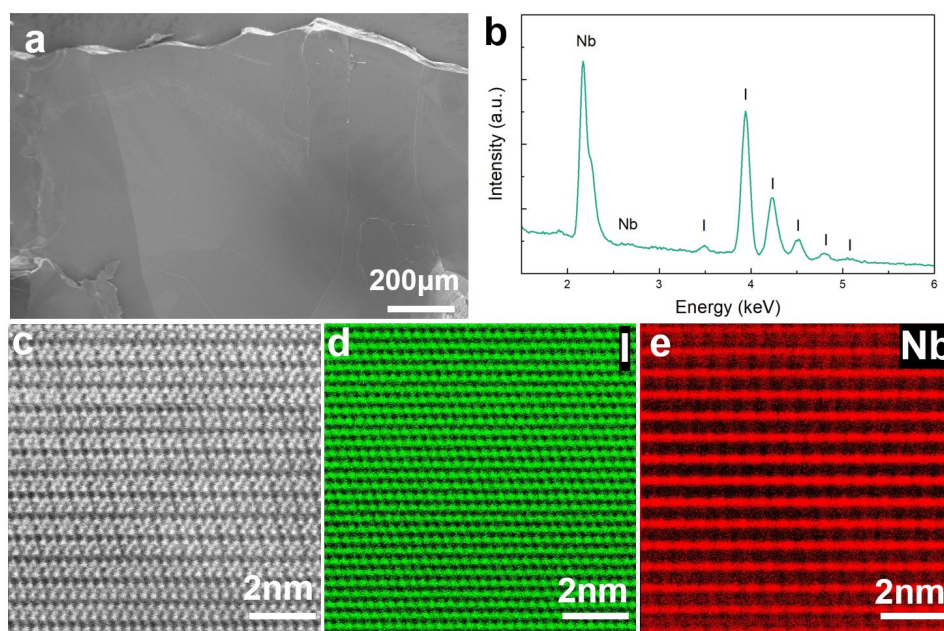

**Supplementary Fig. 1 | SEM image and chemical composition of Nb<sub>3</sub>I<sub>8</sub>.** a, SEM image. b, SEM-EDS spectrum. c-e, HAADF-STEM image and corresponding EDS maps of Nb and iodine atoms.

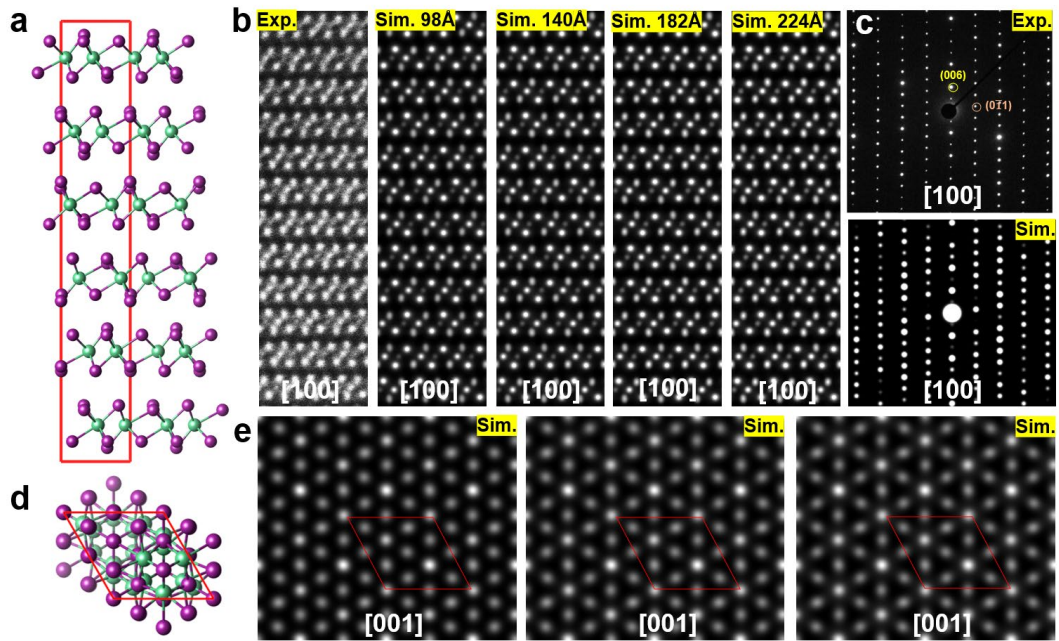

**Supplementary Fig. 2 | Crystal structure schematics of Nb<sub>3</sub>I<sub>8</sub>.** **a**, Side view of Nb<sub>3</sub>I<sub>8</sub> unit cell. **b**, Simulated HAADF-STEM images along [100] zone axis. **c**, SAED patterns of Nb<sub>3</sub>I<sub>8</sub> along [100] zone axis. **d**, Top view of Nb<sub>3</sub>I<sub>8</sub> unit cell. **e**, Simulated HAADF-STEM images along [001] zone axis.

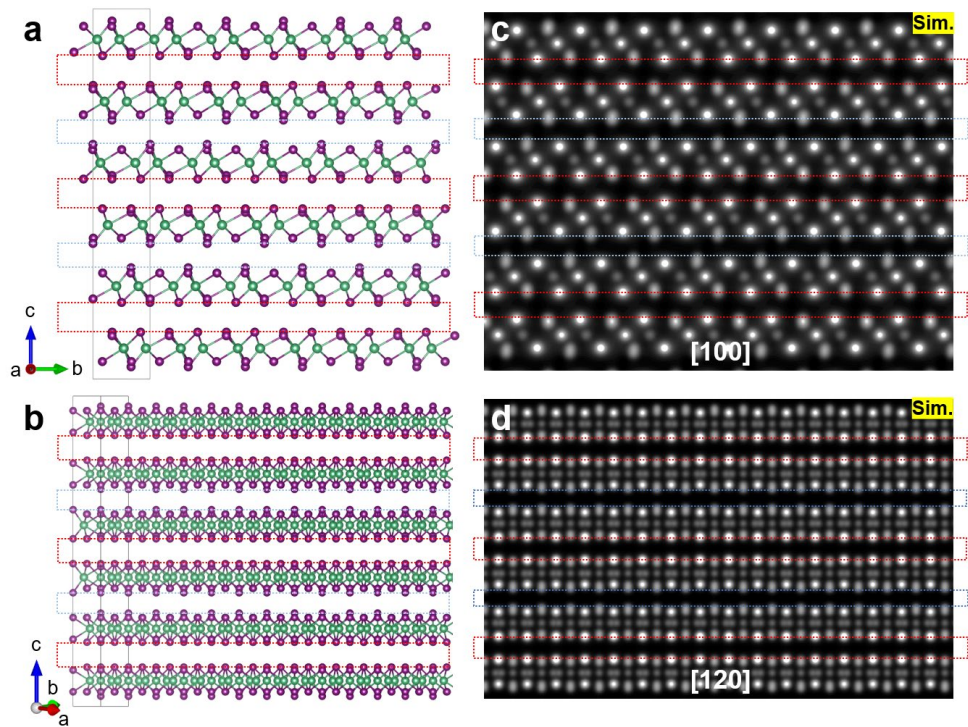

**Supplementary Fig. 3 | VdWs gaps arrangements with alternating distances at atomic-scale in Nb<sub>3</sub>I<sub>8</sub>.** **a** and **b**, Side-views of the crystal structure along [100] and [120] zone axes. **c** and **d**,

Corresponding simulated HAADF-STEM images along [100] and [120] zone axes.

## Section 2. Band structures and polarized Raman spectra of Nb<sub>3</sub>I<sub>8</sub>

### Tunable optical bandgap of Nb<sub>3</sub>I<sub>8</sub> in infrared waveband

As mentioned in the main text, bulk Nb<sub>3</sub>I<sub>8</sub> is indirect with an optical bandgap of ~0.22 eV. Here, considering the interlayer antiferromagnetic configuration of bulk phase, we calculate the spin-resolved band structure of bulk Nb<sub>3</sub>I<sub>8</sub>, as shown in Fig. 4a. The band dispersion of bulk phase of spin up and spin down are almost coincident, giving an indirect bandgap of ~0.38 eV. When the flake is thinned down to monolayer, the ferrovalley feature would appear, as shown in Fig. S4b, c for the calculated results. Considering the ferromagnetic configuration of monolayer Nb<sub>3</sub>I<sub>8</sub>, first-principles calculations show spin-resolved band structures with two direct optical transitions around 1.0 eV in K<sup>+</sup> and K<sup>-</sup> valleys, consistent with the report<sup>1</sup>. Notice that our thinned nanoflakes give an optical bandgap of ~0.68 eV by optical transmission spectroscopy. Thus, the tunable optical bandgap of Nb<sub>3</sub>I<sub>8</sub> in infrared waveband is revealed by our experimental and calculated results.

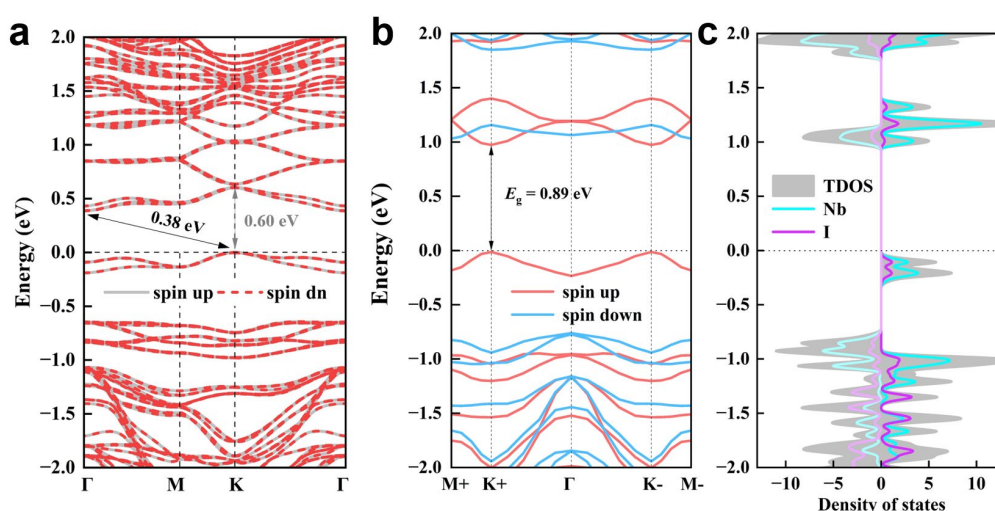

**Supplementary Fig. 4 | Band structure of Nb<sub>3</sub>I<sub>8</sub>.** **a** and **b**, Spin-polarized band structures of bulk (a) and monolayer (b). **c**, Corresponding density of states of monolayer Nb<sub>3</sub>I<sub>8</sub>.



### Linearly and circularly polarized Raman: Optical setup and results

The schematic of optical setup for linearly polarized Raman (LPR) is displayed in Fig. S5a, while that for circularly polarized Raman (CPR) is shown in Fig. S5b. For the LPR measurements, a linear polarizer ( $LP_1$ ) is placed in the incident path to achieve x direction polarization, while another broadband linear polarizer ( $LP_2$ ) is in front of detector for backscattered Raman signal analysis. The  $LP_2$  can be rotated at different angles to obtain the  $360^\circ$  angle-dependent LPR spectra. For the CPR measurements, a quarter-wave plate is placed behind  $LP_1$  in the incident path to achieve the right ( $\sigma^+$ ) or left ( $\sigma^-$ ) circular polarization, while another quarter-wave plate is placed in front of  $LP_2$  for the helicity of backscattered Raman signal analysis. The  $\sigma^+$  (or  $\sigma^-$ ) incident light is confirmed at the sample position. The  $\sigma^-$  or  $\sigma^+$  polarizations in front of detector are employed to check the helicity of the scattered photons. We rotate the quarter-wave plate in front of  $LP_2$  to complete the angle-dependent CPR measurements. We verify the effectivity of our optical setup by referring to the CPR spectra of a  $MoS_2$  flake with a thickness of  $\sim 15$  nm (Fig. S5c). Fig. S5d shows the room-temperature CPR spectrum of a  $MoS_2$  flake in  $z(\sigma^+, \sigma^+)\bar{z}$  and  $z(\sigma^+, \sigma^-)\bar{z}$  geometric configurations. It is clear that the OC phonon scattered photons have the same  $\sigma^+$  helicity as the incident photons (blue curve), while the IMC phonon peak is obviously enhanced under the opposite ( $\sigma^-$ ) polarization (red curve), totally consistent with the previous report<sup>2</sup>, proving the reliability of the optical setup. Subsequently, we perform the angle-dependent LPR and CPR measurements on bulk  $Nb_3I_8$ . As presented in Fig. S6a, the Raman peaks of  $A_{1g}$  modes are continuously weakened till to disappear when the  $LP_2$  is rotated from  $0^\circ$  to  $90^\circ$ . For the angle-dependent CPR results (Fig. S6b), the Raman signals of  $E_g$  modes gradually increase to maximum when the geometries are switched from  $z(\sigma^+, \sigma^+)\bar{z}$  ( $0^\circ$ ) to  $z(\sigma^+, \sigma^-)\bar{z}$  ( $90^\circ$ ). The peak positions of  $A_{1g}$  and  $E_g$  modes are consistent with our first-principles calculations (Fig. S6c).

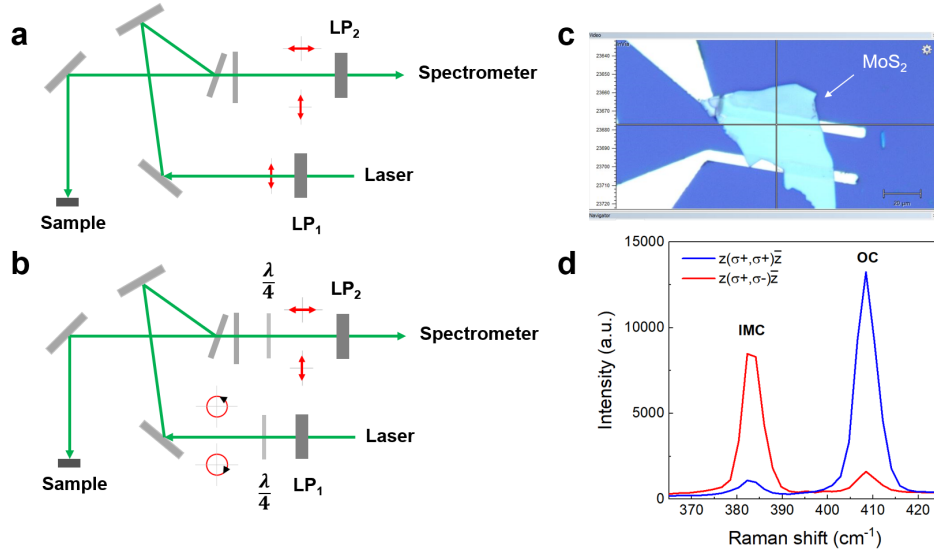

**Supplementary Fig. 5 | Schematic of optical setup for polarized Raman measurements. a and b**, Optical setup for LPR (a) and CPR (b) spectroscopy. **c**, Morphology of the MoS<sub>2</sub> flake with a thickness of ~15 nm. **d**, Room-temperature CPR spectrum of the MoS<sub>2</sub> flake in (c) in  $z(\sigma+, \sigma+)\bar{z}$  and  $z(\sigma+, \sigma-)\bar{z}$  geometric configurations.

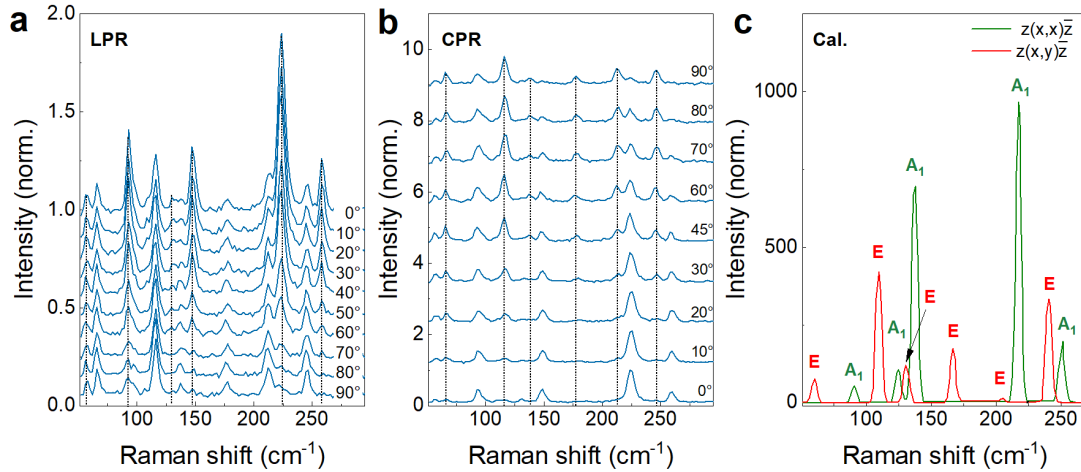

**Supplementary Fig. 6 | Experimental and calculated Raman spectra of Nb<sub>3</sub>I<sub>8</sub>. a and b**, Angle-dependent LPR (a) and CPR (b) spectra. The initial 0° in angle-dependent LPR and CPR measurements, respectively, represent the  $z(x, x)\bar{z}$  and  $z(\sigma+, \sigma-)\bar{z}$  configurations. The dashed lines in **a** and **b** identify the achiral and chiral modes, respectively. **c**, Calculated Raman spectra of monolayer Nb<sub>3</sub>I<sub>8</sub> in  $z(x, x)\bar{z}$  and  $z(x, y)\bar{z}$  configurations.

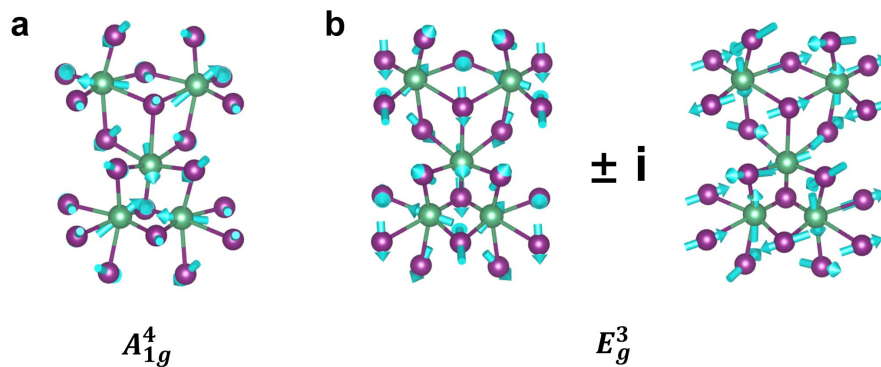

**Supplementary Fig. 7 | Phonon eigenvectors with calculated frequencies of achiral and chiral modes at the Brillouin zone center in Nb<sub>3</sub>I<sub>8</sub>.** **a** and **b**, The Nb and I atomic vibrations of  $A_{1g}^4$  (a) and  $E_g^3$  (b) modes. Note that superposition of two orthogonal linear vibrations of  $E_g^3$  results in right-handed or left-handed circular motions at the  $\Gamma$ -point.

### Section3. Verifying the ferroelectricity in Nb<sub>3</sub>I<sub>8</sub>

Hysteresis loop measurements by piezoresponse force microscopy (PFM) have regarded as a powerful technique for probing polarization switching in nanoscale<sup>3-5</sup>. As known, a ferroelectric material possessing spontaneous polarization that can be reversed by the external electric field, which will show switchable local PFM amplitude and 180° phase loops. Here, the electric-field induced ferroelectricity in Nb<sub>3</sub>I<sub>8</sub> has been verified on different thick flakes (Fig. S8a-c and Fig. S9). The out-of-plane effective piezoelectric constant ( $d_{33}^{eff}$ ) for different thicknesses in the as-prepared Nb<sub>3</sub>I<sub>8</sub> nanoflakes are calculated (Fig. S8d).

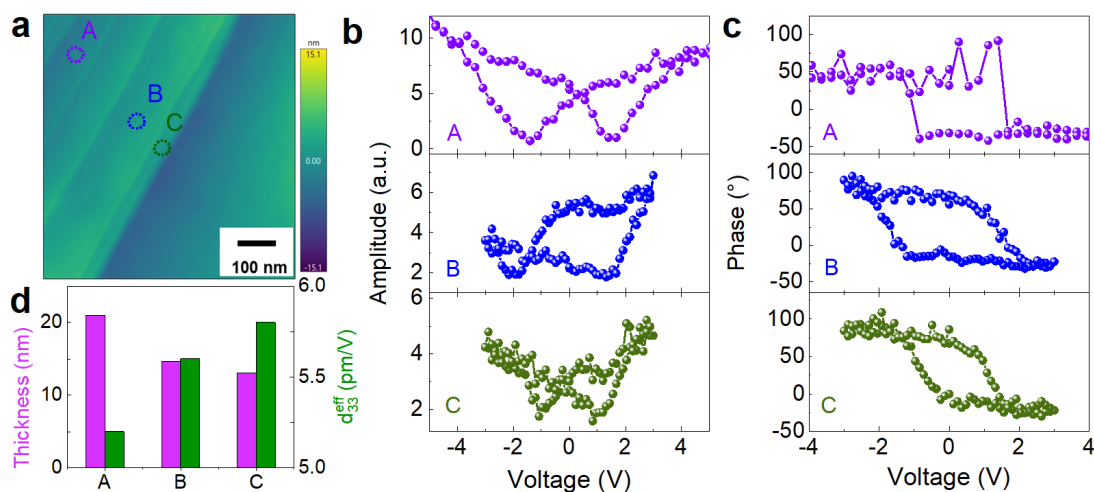

**Supplementary Fig. 8 | Additional PFM results of Nb<sub>3</sub>I<sub>8</sub> flakes with different thicknesses. a,** Morphology of the exfoliated Nb<sub>3</sub>I<sub>8</sub> flake with stepped shape, where the regions marked by A, B, and C represent different thicknesses. **b** and **c**, Local PFM amplitude (b) and PFM phase (c) hysteresis loops from the A, B, and C regions. **d**, The determined thicknesses (purple) and calculated  $d_{33}^{eff}$ -values (green) for A, B, and C regions.

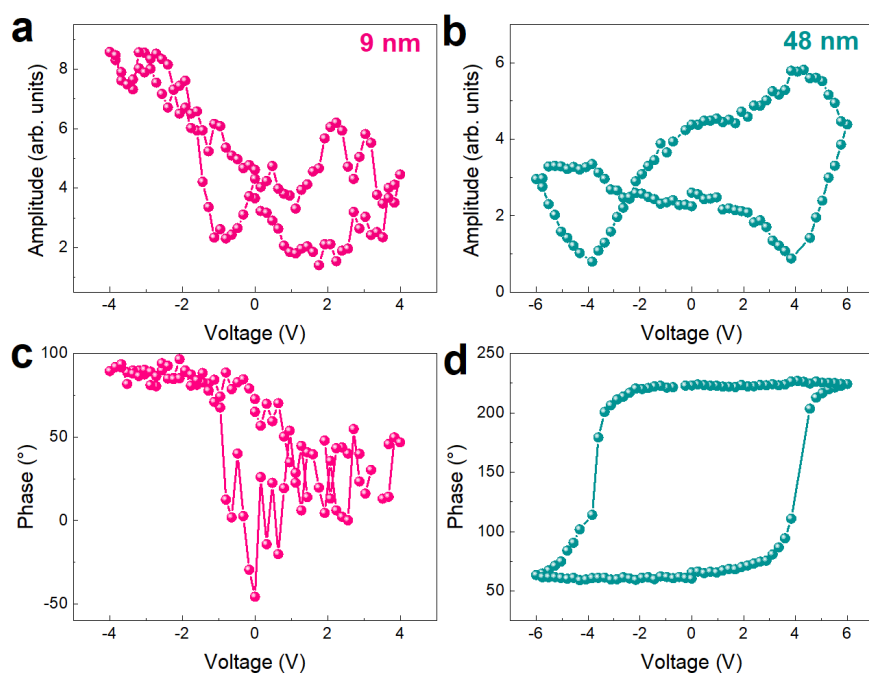

**Supplementary Fig. 9 | Additional PFM results of Nb<sub>3</sub>I<sub>8</sub> flakes with different thicknesses. a-d,** Local PFM amplitude (a, b) and phase (c, d) hysteresis loops of Nb<sub>3</sub>I<sub>8</sub> flakes with thickness of ~9 nm and 48 nm, respectively.



## Section4. Polarization switching in monolayer and bilayer Nb<sub>3</sub>I<sub>8</sub>

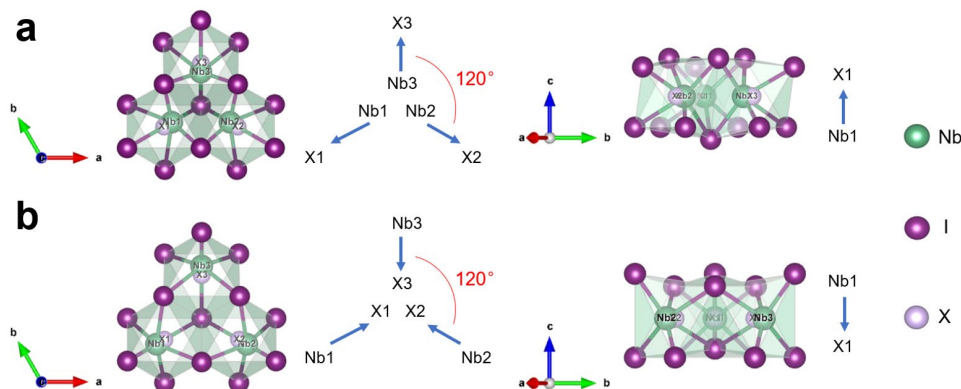

**Supplementary Fig. 10 | Electric polarization states of the small and big triangles of Nb<sub>3</sub>I<sub>13</sub> architectures.** **a** and **b**, Atomic configuration of Nb<sub>3</sub>I<sub>13</sub>, where the X atom represents the center site of the iodine atom in each octahedron. As the angle between any two electric dipole moments is 120 degrees, the net electric dipole moment in a-b plane is zero. However, in the a-c plane, the three octahedra provide an upward dipole moment, which leads to an upward polarization in the Nb<sub>3</sub>I<sub>13</sub> architecture (a) and thus leads to a downward dipole moment in (b). It should be noted that the magnitude of the electric dipole moment in (b) is slightly smaller than that in (a) along c direction.

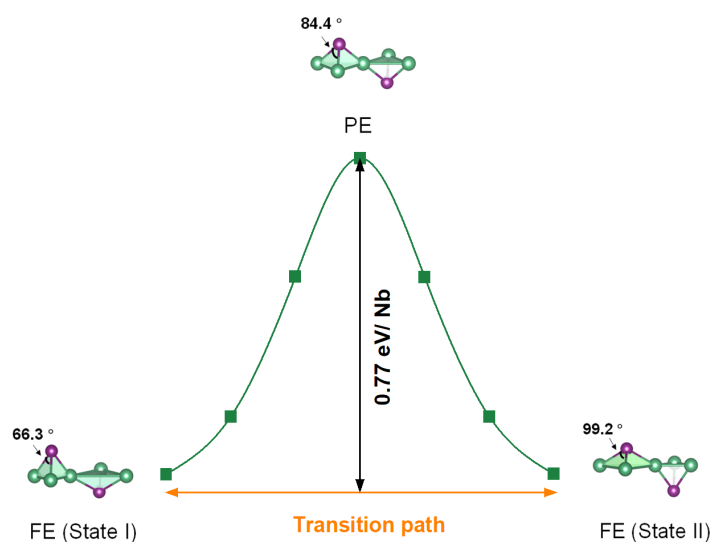

**Supplementary Fig. 11 | Kinetic pathway of polarization switching in monolayer Nb<sub>3</sub>I<sub>8</sub>.** The climbing image nudged elastic band (NEB) results of the Nb<sub>3</sub>I<sub>8</sub> monolayers for ferroelectric switching path from State I to State II. Two ferroelectric (FE) states and the unstable paraelectric

(PE) state are illustrated by the side views of the tetrahedron structures formed by iodine atoms at the top/bottom apex sites and Nb atoms as triangular bases. The energy barrier is calculated to be  $\sim 0.77$  eV per Nb atom, consistent with the report<sup>6</sup>.

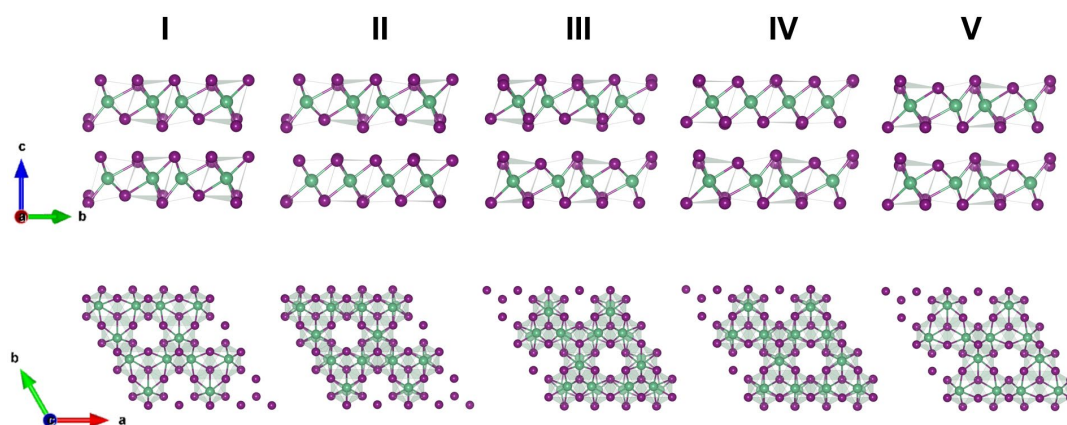

**Supplementary Fig. 12 | Structures of five specified states in bilayer Nb<sub>3</sub>I<sub>8</sub>.** Side-views (upper) and top-views (lower) of five states in bilayer Nb<sub>3</sub>I<sub>8</sub>.

## References

1. Peng, R. et al. Intrinsic anomalous valley Hall effect in single-layer Nb<sub>3</sub>I<sub>8</sub>. *Phys. Rev. B* **102**, 035412 (2020).
2. Chen, S. et al. Helicity-resolved Raman scattering of MoS<sub>2</sub>, MoSe<sub>2</sub>, WS<sub>2</sub>, and WSe<sub>2</sub> atomic layers. *Nano Lett.* **15**, 2526-2532 (2015).
3. Strelcov, E. et al. Role of measurement voltage on hysteresis loop shape in piezoresponse force microscopy. *Appl. Phys. Lett.* **101**, 192902 (2012).
4. Vasudevan, R. K. et al. Ferroelectric or non-ferroelectric: Why so many materials exhibit “ferroelectricity” on the nanoscale. *Appl. Phys. Lett.* **4**, 021302 (2017).
5. Guan, Z. et al. Identifying intrinsic ferroelectricity of thin film with piezoresponse force microscopy. *AIP Adv.* **7**, 095116 (2017).
6. Feng, Y. & Yang Q. Enabling tri ferroics coupling in breathing kagome lattice Nb<sub>3</sub>X<sub>8</sub> (X = Cl, Br, I) monolayers. *J. Mater. Chem. C* **11**, 5762-5769 (2023).
